# Supplementary material
Source: PubMed Central journal article supplement (PMC4944218)
Supplement: JB.00183-16_zjb999094120so1.pdf [file JB.00183-16_zjb999094120so1.pdf]

## Supplementary Material

Supplementary figure legends (Fig S1-S5)

Table S1 - Whole-genome sequencing of YodL-resistant suppressors

Table S2 - Strains

Table S3 - Plasmids

Table S4 - Oligos

Descriptions of strain and plasmid constructions

## Supplementary Figure Legends

**Fig S1. Growth curves in LB following misexpression of YodL and/or YisK.** 2X *P<sub>hy</sub>-yodL* (BAS191), 2X *P<sub>hy</sub>-yisK* (BYD074) and 2X *P<sub>hy</sub>-yodL*, 2X *P<sub>hy</sub>-yisK* (BYD281) were grown in LB media at 37°C to mid-exponential diluted to an OD<sub>600</sub> of <0.02. At time 0, 1 mM IPTG or 1 mM IPTG and the indicated concentration of MgCl<sub>2</sub> was added.

**Fig S2. Misexpression of YodL and YisK on PAB media.** (A) Cells were streaked on PAB solid media supplemented with 100 µg/ml spectinomycin and, when indicated, 1 mM IPTG and the denoted concentration of MgCl<sub>2</sub>. Plates were incubated for ~16 hr at 37°C before image capture. (B) Cells were grown in PAB liquid media at 37°C to mid-exponential and back-diluted to an OD<sub>600</sub> of <0.02. When indicated, 1 mM IPTG and the denoted concentration of MgCl<sub>2</sub> was added. Cells were then grown for 1.5 hrs at 37°C before image capture. Membranes are stained with TMA-DPH (white). All images are shown at the same magnification.

**Fig S3. A strain harboring a GFP reporter without a promoter during a sporulation timecourse.** BAS205 (*P<sub>empty</sub>-gfp*) was induced to sporulate via resuspension, and membranes are stained with TMA (white). Signal from GFP was scaled identically for all images and pseudocolored green. All images are shown at the same magnification.

**Fig S4. Strains lacking *yodL* and/or *yisK* appear morphologically similar to wildtype during a sporulation timecourse.** *B. subtilis* 168 (wt), BYD276 ( $\Delta yodL$ ), BYD278 ( $\Delta yisK$ ) and BYD279 ( $\Delta yodL \Delta yisK$ ) were grown induced to sporulate via resuspension, and cells were grown for the indicated amount of time at 37°C before image capture. Membranes are stained with TMA-DPH (white). All images are shown at the same magnification.

**Fig S5. Location of MreB residues conferring resistance to YodL.** The co-crystal structure of RodZ-MreB (2WUS)(1) was extracted from the Protein Data Bank. MreB is labeled in brown and RodZ is labeled in grey. The identity and locations of the amino acid substitutions obtained from the YodL spontaneous suppressor selections are indicated on the structure, marked by a black asterisk above the relevant amino acid on the sequence alignment. Substitutions that confer resistance to YodL over YisK are shown in bold. Residues previously implicated in the MreB-RodZ interaction interface (1) are indicated by red asterisks. The filled circles indicate the location of the substitutions in Mbl conferring resistance to YodL misexpression. MreB<sub>R117G</sub> (underlined) was identified in a suppressor selections conferring resistance to YodL as well as in suppressor selections conferring resistance to YisK.

**Fig S6. Location of Mbl residues conferring resistance to YisK.** The structure of *B. subtilis* Mbl, as predicted by I-TASSER (2), threaded to *T. maritima* MreB (1JCG)(3). The structure on the right is a surface prediction model. The identity and locations of the amino acid substitutions obtained from the YisK spontaneous suppressor selections are indicated on the structure, with substitutions conferring resistance to YisK over YodL in bold. The sequence alignment is of MreB from *T. maritima*, *B. subtilis* 168, *C. crescentus* NA1000, *E. coli* MG1655, and *V. cholera* N16961. The location of amino acid substitutions conferring YisK resistance are indicated by black asterisks. Residues also previously shown to confer resistance to A22 in *C. crescentus* NA1000 (4, 5) and *V. cholera* N16961 (6) are indicated by red and blue asterisks, respectively. The filled triangle corresponds to a residue shown by in vivo crosslinking to be important for the formation of antiparallel MreB protofilaments (7). The filled circle denotes the location of MreB<sub>R117G</sub>, which was identified in spontaneous suppressor selections conferring resistance to both YodL and YisK. Mbl<sub>T317I</sub> (underlined) was only identified in a spontaneous suppressor selection conferring resistance to YodL, although it exhibits cross-resistance to YisK (see Fig 3).

**Table S1. Whole-genome sequencing of YodL-resistant suppressors**

| Suppressors of YodL | GENE             | COORDINATE | REFERENCE | SAMPLE | DISTRIBUTION | VARIANT    |
|---------------------|------------------|------------|-----------|--------|--------------|------------|
| <b>SYL#1</b>        | <i>lmrB</i>      | 289144     | C         | A      | 50% C, 50% A | G317C      |
|                     | <i>yjgA</i>      | 1284721    | C         | G      | 61% C, 39% G | G17R       |
|                     | <i>mreB</i>      | 2860903    | T         | A      | 100% A       | R282S      |
|                     | <i>biol</i>      | 3089273    | G         | T      | 50% G, 50% T | R381I      |
|                     | <i>yycC-parB</i> | 4205543    | A         | T      | 47% A, 53% T | intergenic |
| <b>SYL#3</b>        | <i>mreB</i>      | 2861400    | G         | C      | 100% C       | R117G      |
| <b>SYL#7</b>        | <i>mbl</i>       | 3747508    | C         | T      | 97% T        | E250K      |
| <b>SYL#8</b>        | <i>mreB</i>      | 2861287    | G         | T      | 98% T        | S154R      |
| <b>SYL#10</b>       | <i>mreB</i>      | 2861309    | G         | C      | 99% C        | P147R      |
| <b>SYL#14</b>       | <i>mreB</i>      | 2860781    | C         | T      | 99% T        | G323E      |
|                     | <i>folC</i>      | 2866565    | C         | A      | 100% A       | G14W       |

**Table S1. Whole-genome sequencing analysis of genomic DNA from six YodL-resistant suppressors.** BYD048 (three copies of *P<sub>hy</sub>-yodL*) was used for suppressor selection. Candidates were analyzed by whole-genome sequencing as described in the materials and methods.

**Table S2. Strains**

| Strain                         | Description                                                                                                                                                                                                                                                                                            | Reference |
|--------------------------------|--------------------------------------------------------------------------------------------------------------------------------------------------------------------------------------------------------------------------------------------------------------------------------------------------------|-----------|
| <b>Parental</b>                |                                                                                                                                                                                                                                                                                                        |           |
| <i>B. subtilis</i> 168 (1A866) | <i>Bacillus subtilis</i> laboratory strain 168 <i>trpC2</i>                                                                                                                                                                                                                                            | BGSC*     |
| DH5 $\alpha$                   | <i>F</i> , <i>endA1</i> , <i>glnV44</i> , <i>thi-1</i> , <i>recA1</i> , <i>relA1</i> , <i>gyrA96</i> , <i>deoR</i> , <i>nupG</i> , $\Phi$ 80 <i>dlacZ</i> $\Delta$ M15, $\Delta$ ( <i>lacZYA-argF</i> )U169, <i>hsdR17</i> ( <i>r<sub>K</sub><sup>-</sup> m<sub>K</sub><sup>+</sup></i> ), $\lambda$ - |           |
| <i>B. subtilis</i> 3610        | <i>spo0H::cat</i> ( <i>sigH::cat</i> )                                                                                                                                                                                                                                                                 | (8)       |

|                                         |                                                                                                                                                                   |                    |
|-----------------------------------------|-------------------------------------------------------------------------------------------------------------------------------------------------------------------|--------------------|
| <i>B. subtilis</i><br>PY79              | <i>spo0A::erm</i> (RL891)                                                                                                                                         | (8)                |
| <b><i>B. subtilis</i></b><br><b>168</b> |                                                                                                                                                                   |                    |
| BAS040                                  | <i>amyE::P<sub>hy</sub>-yodL</i> (spec)                                                                                                                           | This study         |
| BAS041                                  | <i>amyE::P<sub>hy</sub>-yisK</i> (spec)                                                                                                                           | This study         |
| BAS146                                  | <i>ponA::erm, kanΩΔmreB</i>                                                                                                                                       | This study         |
| BAS147                                  | <i>ponA::erm, kanΩΔmbl</i>                                                                                                                                        | This study         |
| BAS170                                  | <i>amyE::P<sub>yodL</sub>-lacZ</i> (spec)                                                                                                                         | This study         |
| BAS171                                  | <i>amyE::P<sub>yodL</sub>-gfp</i> (spec)                                                                                                                          | This study         |
| BAS191                                  | <i>amyE::P<sub>hy</sub>-yodL</i> (spec), <i>yhdG::P<sub>hy</sub>-yodL</i> (phleo)                                                                                 | This study         |
| BAS192                                  | <i>amyE::P<sub>yisK</sub>-lacZ</i> (spec)                                                                                                                         | This study         |
| BAS193                                  | <i>amyE::P<sub>yisK</sub>-gfp</i> (spec)                                                                                                                          | This study         |
| BAS205                                  | <i>amyE::P<sub>empty</sub>-gfp</i> (spec)                                                                                                                         | This study         |
| BAS248                                  | <i>ponA::erm, kanΩΔmbl, catΩΔmreBH, amyE::P<sub>hy</sub>-yisK</i> (spec), <i>yhdG::P<sub>hy</sub>-yisK</i> (phleo)                                                | This study         |
| BAS249                                  | <i>ponA::erm, kanΩΔmbl, catΩΔmreBH, amyE::P<sub>hy</sub>-yodL</i> (spec), <i>yhdG::P<sub>hy</sub>-yodL</i> (phleo)                                                | This study         |
| BAS265                                  | <i>spo0A::erm</i>                                                                                                                                                 | This study         |
| BAS266                                  | <i>amyE::P<sub>yodL</sub>-gfp</i> (spec), <i>spo0A::erm</i>                                                                                                       | This study         |
| BAS267                                  | <i>amyE::P<sub>yisK</sub>-gfp</i> (spec), <i>spo0A::erm</i>                                                                                                       | This study         |
| BAS282                                  | <i>sigH::cat</i>                                                                                                                                                  | This study         |
| BAS301                                  | <i>amyE::P<sub>yodL</sub>-lacZ</i> (spec), <i>spo0A::erm</i>                                                                                                      | This study         |
| BAS302                                  | <i>amyE::P<sub>yisK</sub>-lacZ</i> (spec), <i>spo0A::erm</i>                                                                                                      | This study         |
| BAS303                                  | <i>amyE::P<sub>yodL</sub>-lacZ</i> (spec), <i>sigH::cat</i>                                                                                                       | This study         |
| BAS304                                  | <i>amyE::P<sub>yisK</sub>-lacZ</i> (spec), <i>sigH::cat</i>                                                                                                       | This study         |
| BAS305                                  | <i>amyE::P<sub>yodL</sub>-lacZ</i> (spec), <i>spo0A::erm, sigH::cat</i>                                                                                           | This study         |
| BAS306                                  | <i>amyE::P<sub>yisK</sub>-lacZ</i> (spec), <i>spo0A::erm, sigH::cat</i>                                                                                           | This study         |
| BDR992                                  | <i>amyE::P<sub>hy</sub>-lacZ</i> (spec)                                                                                                                           | David Z.<br>Rudner |
| BKE10750                                | <i>yisK::erm</i>                                                                                                                                                  | BGSC*              |
| BKE19640                                | <i>yodL::erm</i>                                                                                                                                                  | BGSC*              |
| BKE22320                                | <i>ponA::erm</i>                                                                                                                                                  | BGSC*              |
| BYD048                                  | <i>amyE::P<sub>hy</sub>-yodL</i> (spec), <i>ycgO::P<sub>hy</sub>-yodL</i> (tet), <i>yhdG::P<sub>hy</sub>-yodL</i> (phleo), <i>sacA::P<sub>hy</sub>-lacZ</i> (erm) | This study         |
| BYD074                                  | <i>amyE::P<sub>hy</sub>-yisK</i> (spec), <i>yhdG::P<sub>hy</sub>-yisK</i> (phleo)                                                                                 | This study         |
| BYD076                                  | <i>amyE::P<sub>hy</sub>-yisK</i> (spec), <i>yhdG::P<sub>hy</sub>-yisK</i> (phleo), <i>yycR::P<sub>hy</sub>-yisK</i> (cat), <i>sacA::P<sub>hy</sub>-lacZ</i> (erm) | This study         |
| BYD175                                  | <i>ponA::erm, amyE::P<sub>hy</sub>-yisK</i> (spec), <i>yhdG::P<sub>hy</sub>-yisK</i> (phleo)                                                                      | This study         |
| BYD176                                  | <i>ponA::erm, amyE::P<sub>hy</sub>-yodL</i> (spec), <i>yhdG::P<sub>hy</sub>-yodL</i> (phleo)                                                                      | This study         |
| BYD177                                  | <i>kanΩmreB<sub>G323E</sub>, amyE::P<sub>hy</sub>-yisK</i> (spec), <i>yhdG::P<sub>hy</sub>-yisK</i> (phleo), <i>yycR::P<sub>hy</sub>-yisK</i> (cat)               | This study         |
| BYD178                                  | <i>kanΩmreB<sub>P147R</sub>, amyE::P<sub>hy</sub>-yisK</i> (spec), <i>yhdG::P<sub>hy</sub>-yisK</i> (phleo), <i>yycR::P<sub>hy</sub>-yisK</i> (cat)               | This study         |
| BYD179                                  | <i>kanΩmreB<sub>R282S</sub>, amyE::P<sub>hy</sub>-yisK</i> (spec), <i>yhdG::P<sub>hy</sub>-yisK</i> (phleo), <i>yycR::P<sub>hy</sub>-yisK</i> (cat)               | This study         |
| BYD180                                  | <i>kanΩmreB<sub>G143A</sub>, amyE::P<sub>hy</sub>-yisK</i> (spec), <i>yhdG::P<sub>hy</sub>-yisK</i> (phleo), <i>yycR::P<sub>hy</sub>-yisK</i> (cat)               | This study         |
| BYD184                                  | <i>kanΩmreB<sub>R117G</sub>, amyE::P<sub>hy</sub>-yisK</i> (spec), <i>yhdG::P<sub>hy</sub>-yisK</i> (phleo), <i>yycR::P<sub>hy</sub>-yisK</i> (cat)               | This study         |
| BYD258                                  | <i>ponA::erm, kanΩΔmbl, amyE::P<sub>hy</sub>-yisK</i> (spec), <i>yhdG::P<sub>hy</sub>-yisK</i> (phleo)                                                            | This study         |
| BYD259                                  | <i>ponA::erm, kanΩΔmbl, amyE::P<sub>hy</sub>-yodL</i> (spec), <i>yhdG::P<sub>hy</sub>-yodL</i> (phleo)                                                            | This study         |
| BYD262                                  | <i>ponA::erm, kanΩΔmreB, amyE::P<sub>hy</sub>-yisK</i> (spec), <i>yhdG::P<sub>hy</sub>-yisK</i> (phleo)                                                           | This study         |
| BYD263                                  | <i>ponA::erm, kanΩΔmreB, amyE::P<sub>hy</sub>-yodL</i> (spec), <i>yhdG::P<sub>hy</sub>-yodL</i> (phleo)                                                           | This study         |
| BYD276                                  | <i>ΔyodL</i>                                                                                                                                                      | This study         |
| BYD278                                  | <i>ΔyisK</i>                                                                                                                                                      | This study         |

|        |                                                                                                                                              |            |
|--------|----------------------------------------------------------------------------------------------------------------------------------------------|------------|
| BYD279 | <i>ΔyodL, ΔyisK</i>                                                                                                                          | This study |
| BYD281 | <i>amyE::P<sub>hy-yisK</sub> (spec), ycgO::P<sub>hy-yisK</sub> (tet), yhdG::P<sub>hy-yodL</sub> (phleo), yycR::P<sub>hy-yodL</sub> (cat)</i> | This study |
| BYD327 | <i>kanΩmreB<sub>G323E</sub>, amyE::P<sub>hy-yodL</sub> (spec), yhdG::P<sub>hy-yodL</sub> (phleo), yycR::P<sub>hy-yodL</sub> (cat)</i>        | This study |
| BYD328 | <i>kanΩmreB<sub>R117G</sub>, amyE::P<sub>hy-yodL</sub> (spec), yhdG::P<sub>hy-yodL</sub> (phleo), yycR::P<sub>hy-yodL</sub> (cat)</i>        | This study |
| BYD329 | <i>kanΩmreB<sub>N145D</sub>, amyE::P<sub>hy-yodL</sub> (spec), yhdG::P<sub>hy-yodL</sub> (phleo), yycR::P<sub>hy-yodL</sub> (cat)</i>        | This study |
| BYD330 | <i>kanΩmreB<sub>P147R</sub>, amyE::P<sub>hy-yodL</sub> (spec), yhdG::P<sub>hy-yodL</sub> (phleo), yycR::P<sub>hy-yodL</sub> (cat)</i>        | This study |
| BYD332 | <i>kanΩmreB<sub>S154R,R230C</sub>, amyE::P<sub>hy-yodL</sub> (spec), yhdG::P<sub>hy-yodL</sub> (phleo), yycR::P<sub>hy-yodL</sub> (cat)</i>  | This study |
| BYD333 | <i>kanΩmreB<sub>G143A</sub>, amyE::P<sub>hy-yodL</sub> (spec), yhdG::P<sub>hy-yodL</sub> (phleo), yycR::P<sub>hy-yodL</sub> (cat)</i>        | This study |
| BYD334 | <i>kanΩmbl<sub>E250K</sub>, amyE::P<sub>hy-yisK</sub> (spec), yhdG::P<sub>hy-yisK</sub> (phleo), yycR::P<sub>hy-yisK</sub> (cat)</i>         | This study |
| BYD335 | <i>kanΩmbl<sub>T317I</sub>, amyE::P<sub>hy-yodL</sub> (spec), yhdG::P<sub>hy-yodL</sub> (phleo), yycR::P<sub>hy-yodL</sub> (cat)</i>         | This study |
| BYD336 | <i>kanΩmbl<sub>T158M</sub>, amyE::P<sub>hy-yodL</sub> (spec), yhdG::P<sub>hy-yodL</sub> (phleo), yycR::P<sub>hy-yodL</sub> (cat)</i>         | This study |
| BYD337 | <i>kanΩmbl<sub>ΔS251</sub>, amyE::P<sub>hy-yisK</sub> (spec), yhdG::P<sub>hy-yisK</sub> (phleo), yycR::P<sub>hy-yisK</sub> (cat)</i>         | This study |
| BYD338 | <i>kanΩmbl<sub>P309L</sub>, amyE::P<sub>hy-yisK</sub> (spec), yhdG::P<sub>hy-yisK</sub> (phleo), yycR::P<sub>hy-yisK</sub> (cat)</i>         | This study |
| BYD339 | <i>kanΩmbl<sub>G156D</sub>, amyE::P<sub>hy-yisK</sub> (spec), yhdG::P<sub>hy-yisK</sub> (phleo), yycR::P<sub>hy-yisK</sub> (cat)</i>         | This study |
| BYD340 | <i>kanΩmbl<sub>T158A</sub>, amyE::P<sub>hy-yisK</sub> (spec), yhdG::P<sub>hy-yisK</sub> (phleo), yycR::P<sub>hy-yisK</sub> (cat)</i>         | This study |
| BYD341 | <i>kanΩmbl<sub>D153N</sub>, amyE::P<sub>hy-yisK</sub> (spec), yhdG::P<sub>hy-yisK</sub> (phleo), yycR::P<sub>hy-yisK</sub> (cat)</i>         | This study |
| BYD342 | <i>kanΩmbl<sub>R63C</sub>, amyE::P<sub>hy-yisK</sub> (spec), yhdG::P<sub>hy-yisK</sub> (phleo), yycR::P<sub>hy-yisK</sub> (cat)</i>          | This study |
| BYD343 | <i>kanΩmbl<sub>M51I</sub>, amyE::P<sub>hy-yisK</sub> (spec), yhdG::P<sub>hy-yisK</sub> (phleo), yycR::P<sub>hy-yisK</sub> (cat)</i>          | This study |
| BYD344 | <i>kanΩmbl<sub>A314T</sub>, amyE::P<sub>hy-yisK</sub> (spec), yhdG::P<sub>hy-yisK</sub> (phleo), yycR::P<sub>hy-yisK</sub> (cat)</i>         | This study |
| BYD345 | <i>kanΩmbl<sub>E204G</sub>, amyE::P<sub>hy-yisK</sub> (spec), yhdG::P<sub>hy-yisK</sub> (phleo), yycR::P<sub>hy-yisK</sub> (cat)</i>         | This study |
| BYD346 | <i>kanΩmbl<sub>E250K</sub>, amyE::P<sub>hy-yodL</sub> (spec), yhdG::P<sub>hy-yodL</sub> (phleo), yycR::P<sub>hy-yodL</sub> (cat)</i>         | This study |
| BYD348 | <i>kanΩmbl<sub>T158A</sub>, amyE::P<sub>hy-yodL</sub> (spec), yhdG::P<sub>hy-yodL</sub> (phleo), yycR::P<sub>hy-yodL</sub> (cat)</i>         | This study |
| BYD349 | <i>kanΩmbl<sub>G156D</sub>, amyE::P<sub>hy-yodL</sub> (spec), yhdG::P<sub>hy-yodL</sub> (phleo), yycR::P<sub>hy-yodL</sub> (cat)</i>         | This study |
| BYD351 | <i>kanΩmbl<sub>D153N</sub>, amyE::P<sub>hy-yodL</sub> (spec), yhdG::P<sub>hy-yodL</sub> (phleo), yycR::P<sub>hy-yodL</sub> (cat)</i>         | This study |
| BYD352 | <i>kanΩmbl<sub>M51I</sub>, amyE::P<sub>hy-yodL</sub> (spec), yhdG::P<sub>hy-yodL</sub> (phleo), yycR::P<sub>hy-yodL</sub> (cat)</i>          | This study |
| BYD353 | <i>kanΩmbl<sub>A314T</sub>, amyE::P<sub>hy-yodL</sub> (spec), yhdG::P<sub>hy-yodL</sub> (phleo), yycR::P<sub>hy-yodL</sub> (cat)</i>         | This study |
| BYD354 | <i>kanΩmbl<sub>E204G</sub>, amyE::P<sub>hy-yodL</sub> (spec), yhdG::P<sub>hy-yodL</sub> (phleo), yycR::P<sub>hy-yodL</sub> (cat)</i>         | This study |
| BYD361 | <i>amyE::P<sub>hy-yisK</sub> (spec), yhdG::P<sub>hy-yodL</sub> (phleo)</i>                                                                   | This study |
| BYD363 | <i>kanΩmreB<sub>S154R,R230C</sub>, amyE::P<sub>hy-yisK</sub> (spec), yhdG::P<sub>hy-yisK</sub> (phleo), yycR::P<sub>hy-yisK</sub> (cat)</i>  | This study |
| BYD365 | <i>kanΩmreB<sub>R282S</sub>, amyE::P<sub>hy-yodL</sub> (spec), yhdG::P<sub>hy-yodL</sub> (phleo), yycR::P<sub>hy-yodL</sub> (cat)</i>        | This study |
| BYD404 | <i>kanΩmreB<sub>N145D</sub>, amyE::P<sub>hy-yisK</sub> (spec), yhdG::P<sub>hy-yisK</sub> (phleo), yycR::P<sub>hy-yisK</sub> (cat)</i>        | This study |
| BYD405 | <i>kanΩmbl<sub>R63C</sub>, amyE::P<sub>hy-yodL</sub> (spec), yhdG::P<sub>hy-yodL</sub> (phleo), yycR::P<sub>hy-yodL</sub> (cat)</i>          | This study |
| BYD406 | <i>kanΩmbl<sub>ΔS251</sub>, amyE::P<sub>hy-yodL</sub> (spec), yhdG::P<sub>hy-yodL</sub> (phleo), yycR::P<sub>hy-yodL</sub> (cat)</i>         | This study |
| BYD407 | <i>kanΩmbl<sub>P309L</sub>, amyE::P<sub>hy-yodL</sub> (spec), yhdG::P<sub>hy-yodL</sub> (phleo), yycR::P<sub>hy-yodL</sub> (cat)</i>         | This study |
| BYD510 | <i>ΔyodL, ΔyisK, amyE::P<sub>yisK-yisK</sub> (spec)</i>                                                                                      | This study |

\*Bacillus Genetic Stock Center

**Table S3. Plasmids**

| Plasmid | Description                                                                 | Reference       |
|---------|-----------------------------------------------------------------------------|-----------------|
| pAS015  | <i>yhdG::P<sub>hy-yisK</sub> (amp)</i>                                      | This study      |
| pAS040  | <i>amyE::P<sub>yodL-lacZ</sub> (amp)</i>                                    | This study      |
| pAS041  | <i>amyE::P<sub>yodL-gfp</sub> (amp)</i>                                     | This study      |
| pAS044  | <i>amyE::P<sub>yisK-lacZ</sub> (amp)</i>                                    | This study      |
| pAS045  | <i>amyE::P<sub>yisK-gfp</sub> (amp)</i>                                     | This study      |
| pAS047  | <i>amyE::gfp (amp)</i>                                                      | This study      |
| pAS067  | <i>amyE::P<sub>yisK-yisK</sub> (amp)</i>                                    | This study      |
| pDR111  | <i>amyE::P<sub>hy</sub> (amp)</i>                                           | David Z. Rudner |
| pDR244  | Temperature sensitive Cre recombinase plasmid ( <i>amp</i> )( <i>spec</i> ) | David Z.        |

|        |                                            |                    |
|--------|--------------------------------------------|--------------------|
|        |                                            | Rudner             |
| pJH036 | <i>sacA::P<sub>hy</sub>-lacZ (amp)</i>     | This study         |
| pJW004 | <i>yhdG::P<sub>hy</sub> (amp)</i>          | This study         |
| pJW006 | <i>amyE::P<sub>hy</sub>-sirA-gfp (amp)</i> | (9)                |
| pJW033 | <i>ycgO::P<sub>hy</sub> (amp)</i>          | This study         |
| pJW034 | <i>yycR::P<sub>hy</sub> (amp)(cat)</i>     | This study         |
| pKM062 | <i>sacA::erm (amp)</i>                     | David Z.<br>Rudner |
| pWX114 | <i>yrvN::P<sub>hy</sub> (amp)(kan)</i>     | David Z.<br>Rudner |
| pYD073 | <i>yhdG::P<sub>hy</sub>-yodL (amp)</i>     | This study         |
| pYD155 | <i>yycR::P<sub>hy</sub>-yodL (amp)</i>     | This study         |
| pYD156 | <i>ycgO::P<sub>hy</sub>-yisK (amp)</i>     | This study         |

**Table S4. Oligos**

| Oligo  | Sequence 5' to 3'                                             |
|--------|---------------------------------------------------------------|
| OAM001 | AGAAGCGTTAGCGGCAGCAAGTGAT                                     |
| OAM002 | CCATGTCTGCCCGTATTTTCGCGTAAGGAAATCCATTATGTACTATTTTCGATCAGACCAG |
| OAM009 | GAAAACAATAAACCCCTTGCATAGGGGGATCGGGCAAGGCTAGACGGGACTTACC       |
| OAM010 | ATGGACACAACAACAGCAAAACAGGC                                    |
| OAM011 | TAATGGATTTCTTACGCGAAATA                                       |
| OAM013 | AGTAGTTCCTCCTTATGTAAGC                                        |
| OAS064 | TCCTCCTTTTCAAAGAAAAAAC                                        |
| OAS067 | TGTTACATATTGCTGCTTTTTGGT                                      |
| OAS078 | GGATCCCAGCGAACCATTTGA                                         |
| OAS079 | GTCGACAAATTCCTCGTAGGC                                         |
| OAS080 | CCTATCACCTCAAATGGTTCGCTGGGATCCAAAGCAAAAATACCCTAAAGGGAA        |
| OAS081 | GTCCCGAGCGCCTACGAGGAATTTGTCGACACACTTTTTTTTCGTCGAATTAAG        |
| OAS086 | CGAATACATACGATCCTACAGC                                        |
| OAS087 | CCTATCACCTCAAATGGTTCGCTGGGATCCAAAAGTTGGAAGCACAATAAGTT         |
| OAS088 | GTCCCGAGCGCCTACGAGGAATTTGTCGACATCACCTGGCATTGCCTTCTT           |
| OAS089 | ATTAATGGTGATATTCTTCATTGA                                      |
| OAS091 | AGATGGATGTGCTCCAGTGCTCCAAGATCTATACCAAGGTCT                    |
| OAS092 | AGACCTTGGTATAGATCTTGGAGCACTGGAGCACATCCATCT                    |
| OAS095 | GGAAGCTTGTCCATATTATCAAGATTTGCAGTACCGAGGTCAATA                 |
| OAS096 | TATTGACCTCGGTACTGCAAATCTTGATAATATGGACAAGCTTCC                 |
| OAS114 | TCTAAGGAATTCCTGTTTTAGTCGGCATAAGCAG                            |
| OAS116 | GTAATCTTACGTCAGTAACTTCCACCAAGATCCCCTCCCTTTTATTT               |
| OAS117 | AAGAAATAAAAGGGAGGGGATCTTGGTGGAAGTTACTGACGTAAGAT               |
| OAS118 | ACTTAGGGATCCTTATTTTACACCCAGACCAACT                            |
| OAS119 | TGAAAAGTTCTTCTCCTTTACTCATCAAGATCCCCTCCCTTTTATTT               |
| OAS120 | AAGAAATAAAAGGGAGGGGATCTTGATGAGTAAAGGAGAAGAACTTTTC             |
| OAS121 | ACTTAGGGATCCTTATTTGTATAGTTCATCCATGCCAT                        |
| OAS134 | TCTAAGGAATTCCTTTTTAGCTGCTCCCGAT                               |
| OAS135 | GTAATCTTACGTCAGTAACTTCCACGTTATTCCTCCATCATCTTTTAAA             |
| OAS136 | ATTTAAAAGATGATGGAGGAATAACGTGGAAGTTACTGACGTAAGAT               |
| OAS137 | TGAAAAGTTCTTCTCCTTTACTCATGTTATTCCTCCATCATCTTTTAAA             |
| OAS138 | ATTTAAAAGATGATGGAGGAATAACATGAGTAAAGGAGAAGAACTTTTC             |
| OAS148 | TCTAAGGAATTCATGAGTAAAGGAGAAGAACTTTTC                          |
| OAS149 | ACTTAGGGATCCTTATTTGTATAGTTCATCCATGCC                          |
| OAS274 | TCTAAGGAATTCCTTTTTAGCTGCTCCCGA                                |
| OAS275 | ACTTAGGGATCCTCAGCCAATTTGGTTTGACAG                             |
| OEA035 | GGATAACAATTAAGCTTACATAAGGAGGAACTACTATGAAATTTGCGACAGGGGAACTT   |
| OEA036 | TTCCACCGAATTAGCTTGCATGCGGCTAGCCCAGTTTTTATTCAGCCAATTTGGT       |

|        |                                                             |
|--------|-------------------------------------------------------------|
| OEA275 | GGATAACAATTAAGCTTACATAAGGAGGAACTACTATGATGTTATCCGTGTTTAAAAAG |
| OEA276 | TTCCACCGAATTAGCTTGCATGCGGCTAGCTTTCTTTTCATTATGTCGTTTGTA      |
| OJH159 | CTGCAGGAATTCGACTCTCTA                                       |
| OJH160 | TAGCTTGCATGCGGCTAGC                                         |
| OJH185 | CAGGAATTCGACTCTCTAGC                                        |
| OJH186 | CTCAGCTAGCTAACTCACATTAATTGCGTTGC                            |

## Strain Construction

The Gibson enzymatic assembly method has been described in detail (10).

Except where otherwise indicated, PCR amplifications are performed using *B. subtilis* 168 genomic DNA as template.

To generate unmarked derivatives the BGSC strains (BKE22320, BKE19640, and BKE10750) each strain was transformed with pDR244, selecting for spectinomycin resistance at 30°C. Isolated colonies were restreaked on LB media and placed at 42°C. Isolated colonies from these plates were streaked again on spectinomycin, MLS, and LB plates. Clones that were sensitive to both spectinomycin and MLS were used to generate freezer stocks. Loss of the *erm* resistance cassette was confirmed by PCR.

### Moving suppressor mutations in *mbi* into clean genetic backgrounds

To move the mutant *mbi* alleles obtained in the suppressor selections, we generated linear Gibson assembly products corresponding to a region of ~1,500 bp upstream of *mbi* (“UP”), a kanamycin resistance cassette (“KAN”), and each mutant *mbi* allele plus ~1,500 bp downstream of *mbi* (“DOWN”). This linear double stranded DNA product was then transformed directly into *B. subtilis*. Double cross-over recombination was selected for by plating on LB plates supplemented with 10 µg/ml kanamycin. To confirm the presence of the relevant mutations, and the absence of others, the entire *mbi* ORF was sequenced. The “UP” fragment comprised a region of homology to the *B. subtilis* chromosome upstream of *mbi* (including a region downstream of *spoIIID*), and was amplified from genomic DNA using oAS86 and oAS87. The “KAN” fragment was made by amplifying a kanamycin cassette from pWX114a using oAS78 and oAS79. The “DOWN” fragment corresponded to a region including the *mbi* promoter, *mbi* and 1500bp downstream of *mbi* and was amplified from genomic DNA of each corresponding suppressor strain using oAS88 and oAS89. For each allele of interest, the three products were combined in single Gibson assembly reaction and transformed directly into *B. subtilis* 168, selecting for kanamycin resistance. To confirm the presence of the relevant mutation(s) and the absence of others, the entire *mbi* ORF was sequenced.

### Moving suppressor mutations in *mreB* into clean genetic backgrounds

To move the mutant *mreB* alleles obtained in the suppressor selections, we generated linear Gibson assembly products corresponding to a region of ~1,500 bp upstream of *mreB* (“UP”), a kanamycin resistance cassette (“KAN”), and each mutant *mreB* allele plus ~1,500 bp downstream of *mreB* (“DOWN”). This linear double stranded DNA product was then transformed directly into *B. subtilis*. Double cross-over recombination was selected for by plating on LB plates supplemented with 10 µg/ml kanamycin. To confirm the presence of the relevant mutations, and the absence of others, the entire *mreB* ORF was sequenced. The “UP” fragment comprised a region of homology to the *B. subtilis* chromosome upstream of *mreB* (including a region downstream of *radC*), and was amplified from genomic DNA using oAS64 and oAS80. The “KAN” fragment was made by amplifying a kanamycin cassette from pWX114a using oAS78 and oAS79. The “DOWN” fragment corresponded to a region including the *mreB* promoter, *mreB* and 1500bp downstream of *mreB* and was amplified from genomic DNA of each corresponding suppressor strain using oAS81 and oAS67. For each allele of interest, the three products were combined in single Gibson assembly reaction and transformed

directly into *B. subtilis* 168, selecting for kanamycin resistance. To confirm the presence of the relevant mutation(s) and the absence of others, the entire *mreB* ORF was sequenced.

**BAS040** was generated by transforming a linear Gibson assembly product encoding a region upstream of *amyE*, a spectinomycin cassette, the  $P_{hy}$  promoter, an optimized ribosome binding site, *yodL*, *lacI*, and a region downstream of *amyE* into *B. subtilis* 168, and selecting for spectinomycin resistance. The final strain was confirmed by PCR and sequencing. The region of upstream of *amyE* was PCR amplified from *B. subtilis* 168 genomic DNA using OAM009 and OAM010. The spectinomycin resistance cassette and the  $P_{hy}$  promoter were PCR amplified from pDR111 using primers OAM10 and OAM13, and included a ribosome binding site (TAAGGAGG). The *yodL* ORF was PCR amplified using OEA275 and OEA276. *lacI* was PCR amplified from pDR111 using OAM011 and OAM012. The region downstream of *amyE* was PCR amplified from *B. subtilis* 168 genomic DNA using OAM001 and OAM002.

**BAS041** was generated by transforming a linear Gibson assembly product encoding a region upstream of *amyE*, a spectinomycin cassette, the  $P_{hy}$  promoter, an optimized ribosome binding site, *yisK*, *lacI*, and a region downstream of *amyE* into *B. subtilis* 168, and selecting for spectinomycin resistance. The final strain was confirmed by PCR and sequencing. The region of upstream of *amyE* was PCR amplified from *B. subtilis* 168 genomic DNA using OAM009 and OAM010. The spectinomycin resistance cassette and the  $P_{hy}$  promoter were PCR amplified from pDR111 using primers OAM10 and OAM13, and included a ribosome binding site (TAAGGAGG). The *yisK* ORF was PCR amplified using OEA035 and OEA036. *lacI* was PCR amplified from pDR111 using OAM011 and OAM012. The region downstream of *amyE* was PCR amplified from *B. subtilis* 168 genomic DNA using OAM001 and OAM002.

**BAS147** was generated by directly transforming a Gibson assembly of a region upstream of *mbI*, a kanamycin resistance cassette, and an *mbI* knockout fragment (see below) directly into BKE22320, selecting for kanamycin resistance in the presence of 10 mM  $MgCl_2$ . The region upstream of *mbI* was amplified using OAS86 and OAS87 (*B. subtilis* 168 genomic DNA template). The kanamycin resistance cassette was amplified from pWX114a using OAS78 and OAS79. The *mbI* knockout fragment was made by amplifying a DNA product that included the first 42 bp of *mbI* and its upstream region using oAS86 and oAS95 (*B. subtilis* 168 genomic DNA template), amplifying a DNA product that included the last 42 bp *mbI* and its downstream region using oAS96 and oAS89 (*B. subtilis* 168 genomic DNA template), and splicing the two fragments together using overlap extension PCR with OAS088 and OAS089. The kanamycin-linked *mbI* knockout was confirmed by PCR amplification.

**BAS170** was made by transforming *B. subtilis* 168 with pAS040 linearized with *Scal* and selecting for spectinomycin resistance. Integrations were confirmed by starch test.

**BAS171** was made by transforming *B. subtilis* 168 with pAS041 linearized with *Scal* and selecting for spectinomycin resistance. Integrations were confirmed by starch test.

**BAS192** was made by transforming *B. subtilis* 168 with pAS044 linearized with *Scal* and selecting for spectinomycin resistance. Integrations were confirmed by starch test and sequencing.

**BAS193** was made by transforming *B. subtilis* 168 with pAS045 linearized with *Scal* and selecting for spectinomycin resistance. Integrations were confirmed by starch test and sequencing.

**BAS265** was generated by transforming *B. subtilis* 168 with genomic DNA from RL891 and selecting for erythromycin resistance (*erm*). Recommend growth on 0.5  $\mu$ g/ml erythromycin (*erm*) and 12.5  $\mu$ g/ml lincomycin (0.5X normal antibiotic concentration).

**BAS282** was generated by transforming *B. subtilis* 168 with genomic DNA from BJH154 and selecting on chloramphenicol.

**BYD258** was generated by directly transforming a Gibson assembly of a region upstream of *mbI*, a kanamycin resistance cassette, and an *mbI* knockout fragment (see below) directly into BYD175, selecting for kanamycin resistance in the presence of 10 mM MgCl<sub>2</sub>. The region upstream of *mbI* was amplified using OAS86 and OAS87 (*B. subtilis* 168 genomic DNA template). The kanamycin resistance cassette was amplified from pWX114a using OAS78 and OAS79. The *mbI* knockout fragment was made by amplifying a DNA product that included the first 42 bp of *mbI* and its upstream region using oAS86 and oAS95 (*B. subtilis* 168 genomic DNA template), amplifying a DNA product that included the last 42 bp *mbI* and its downstream region using oAS96 and oAS89 (*B. subtilis* 168 genomic DNA template), and splicing the two fragments together using overlap extension PCR with OAS088 and OAS089. The kanamycin-linked *mbI* knockout was confirmed by PCR amplification.

**BYD259** was generated as described for BYD258, but transforming the final Gibson assembly into BYD176. The kanamycin-linked *mbI* knockout was confirmed by PCR amplification.

**BYD262** was generated by directly transforming a Gibson assembly of a region upstream of *mreB*, a kanamycin resistance cassette, and an *mreB* knockout fragment (see below) directly into BYD175, selecting for kanamycin resistance in the presence of 10 mM MgCl<sub>2</sub>. The region upstream of *mreB* was amplified using OAS64 and OAS80 (*B. subtilis* 168 genomic DNA template) and was designed to include the putative *radC* terminator/*mreB* promoter region to avoid the chances of disrupting the terminator. The kanamycin resistance cassette was amplified from pWX114a using OAS78 and OAS79. The *mreB* knockout fragment was made by amplifying the *mreBCD* promoter region and the first 42bp of *mreB* using oAS64 and oAS91 (*B. subtilis* 168 genomic DNA template), amplifying the last 42bp of *mreB* along with region downstream of *mreB* using OAS92 and OAS67 (*B. subtilis* 168 genomic DNA template), and splicing the two fragments together using overlap extension PCR with oAS81 and oAS67. The kanamycin-linked *mreB* knockout was confirmed by PCR amplification. The final integration product encodes identical sequences before and after the kanamycin cassette, so loss of the kanamycin resistance cassette is possible in the absence of selective pressure.

**BYD263** was generated as described for BYD262, but transforming the final Gibson assembly into BYD176. The kanamycin-linked *mreB* knockout was confirmed by PCR amplification.

### Plasmid construction

**pAS015** was generated by cloning PCR product from OJH159 and OJH160 amplification of genomic DNA from BAS041 into pJW004 (EcoRI-NheI).

**pAS040** was generated with overlap extension PCR. The “UP” product encoding the *yodL* promoter region was amplified from *B. subtilis* 168 genomic DNA with primer pair OAS114/OAS116. The “DOWN” product encoding *lacZ* was amplified from genomic DNA from SYL#8 (Table S1) using primer pair OAS117/OAS118. The two PCR products were used as template for overlap extension PCR using primer pair OAS114/OAS118. The amplified fragment was cut with EcoRI and BamHI and cloned into pDR111 cut with the same enzymes.

**pAS041** was generated with overlap extension PCR. The “UP” product was amplified from *B. subtilis* 168 genomic DNA with primer pair OAS114/OAS119. The “DOWN” product was amplified from pJW006 with primer pair OAS120/ OAS121. The two PCR products were used as template for overlap extension PCR with primer pair OAS114/OAS121. The amplified fragment was cut with EcoRI and BamHI and cloned into pDR111 cut with the same enzymes.



**pAS044** was generated with overlap extension PCR. The “UP” product encoding the *yisK* promoter region was amplified from *B. subtilis* 168 genomic DNA template using primer pair OAS134/OAS135. The “DOWN” product encoding the *lacZ* gene was amplified from genomic DNA of SYL#8 (Table S1) with primer pair OAS136/OAS118. The two PCR products were used as template for overlap extension PCR using primer pair OAS134/OAS118. The amplified fragment was cut with EcoRI and BamHI and cloned into pDR111 cut with the same enzymes.

**pAS045** was generated with overlap extension PCR. The “UP” product was amplified from *B. subtilis* 168 genomic DNA template using primer pair OAS134/OAS137. The “DOWN” product was amplified from pJW006 with primer pair OAS138/ OAS121. The two PCR products were used as template for overlap extension PCR with primer pair OAS134/OAS121. The amplified fragment was cut with EcoRI and BamHI and cloned into pDR111 cut with the same enzymes.

**pAS047** was generated by cloning PCR product from an OAS148 and OAS149 amplification of pJW006 into pDR111 (EcoRI-BamHI).

**pAS067** was generated by cloning the PCR product obtained from an OAS274 and OAS275 amplification of *B. subtilis* 168 genomic DNA template (encoding 200bp upstream of *yisK* and *yisK*) into pDR111 (EcoRI-BamHI).

**pJH036** was generated by cloning the PCR product obtained from an OJH185 and OJH186 amplification of genomic DNA from BDR992 (encoding  $P_{hy}$ -*lacZ*) into pKM062 (EcoRI-NheI).

**pJW004** was generated by cloning the ~1770 bp BamHI-EcoRI fragment from pDR111 (encoding the  $P_{hy}$  promoter and *lacI*) into pBB280, an allelic exchange vector that integrates at the *yhdG* locus and confers phleomycin resistance.

**pJW033** was generated by cloning the ~1770 bp BamHI-EcoRI fragment from pDR111 (encoding the  $P_{hy}$  promoter and *lacI*) into pKM086, an allelic integration vector that integrates at the *ycgO* locus and confers tetracycline resistance.

**pJW034** was generated by cloning the ~1770 bp BamHI-EcoRI fragment from pDR111 (encoding the  $P_{hy}$  promoter and *lacI*) into pNS037, an allelic exchange vector that integrates at the *yycR* locus and confers chloramphenicol resistance.

**pYD073** was generated by cloning PCR product from OJH159 and OJH160 amplification using genomic DNA from BAS040 ( $amyE::P_{hy}$ -*yodL*) and cloning into the EcoRI-NheI sites of pJW004.

**pYD155** was generated by cloning PCR product from OJH159 and OJH160 amplification using genomic DNA from BAS040 and cloning into the EcoRI-NheI sites of pJW034.

**pYD156** was generated by cloning PCR product from OJH159 and OJH160 amplification using genomic DNA from BAS040 and cloning into the EcoRI-NheI sites of pJW033.

## REFERENCES

1. van den Ent F, Johnson CM, Persons L, de Boer P, Lowe J. 2010. Bacterial actin MreB assembles in complex with cell shape protein RodZ. EMBO J 29:1081-1090.

2. **Yang J, Yan R, Roy A, Xu D, Poisson J, Zhang Y.** 2015. The I-TASSER Suite: protein structure and function prediction. *Nat Methods* **12**:7-8.
3. **van den Ent F, Amos LA, Lowe J.** 2001. Prokaryotic origin of the actin cytoskeleton. *Nature* **413**:39-44.
4. **Dye NA, Pincus Z, Fisher IC, Shapiro L, Theriot JA.** 2011. Mutations in the nucleotide binding pocket of MreB can alter cell curvature and polar morphology in *Caulobacter*. *Mol Microbiol* **81**:368-394.
5. **Gitai Z, Dye NA, Reisenauer A, Wachi M, Shapiro L.** 2005. MreB actin-mediated segregation of a specific region of a bacterial chromosome. *Cell* **120**:329-341.
6. **Srivastava P, Demarre G, Karpova TS, McNally J, Chatteraj DK.** 2007. Changes in nucleoid morphology and origin localization upon inhibition or alteration of the actin homolog, MreB, of *Vibrio cholerae*. *J Bacteriol* **189**:7450-7463.
7. **van den Ent F, Izore T, Bharat TA, Johnson CM, Lowe J.** 2014. Bacterial actin MreB forms antiparallel double filaments. *Elife* **3**:e02634.
8. **Branda SS, Gonzalez-Pastor JE, Ben-Yehuda S, Losick R, Kolter R.** 2001. Fruiting body formation by *Bacillus subtilis*. *Proc Natl Acad Sci U S A* **98**:11621-11626.
9. **Wagner JK, Marquis KA, Rudner DZ.** 2009. SirA enforces diploidy by inhibiting the replication initiator DnaA during spore formation in *Bacillus subtilis*. *Mol Microbiol* **73**:963-974.
10. **Gibson DG, Young L, Chuang RY, Venter JC, Hutchison CA, 3rd, Smith HO.** 2009. Enzymatic assembly of DNA molecules up to several hundred kilobases. *Nat Methods* **6**:343-345.

## Growth curves in LB

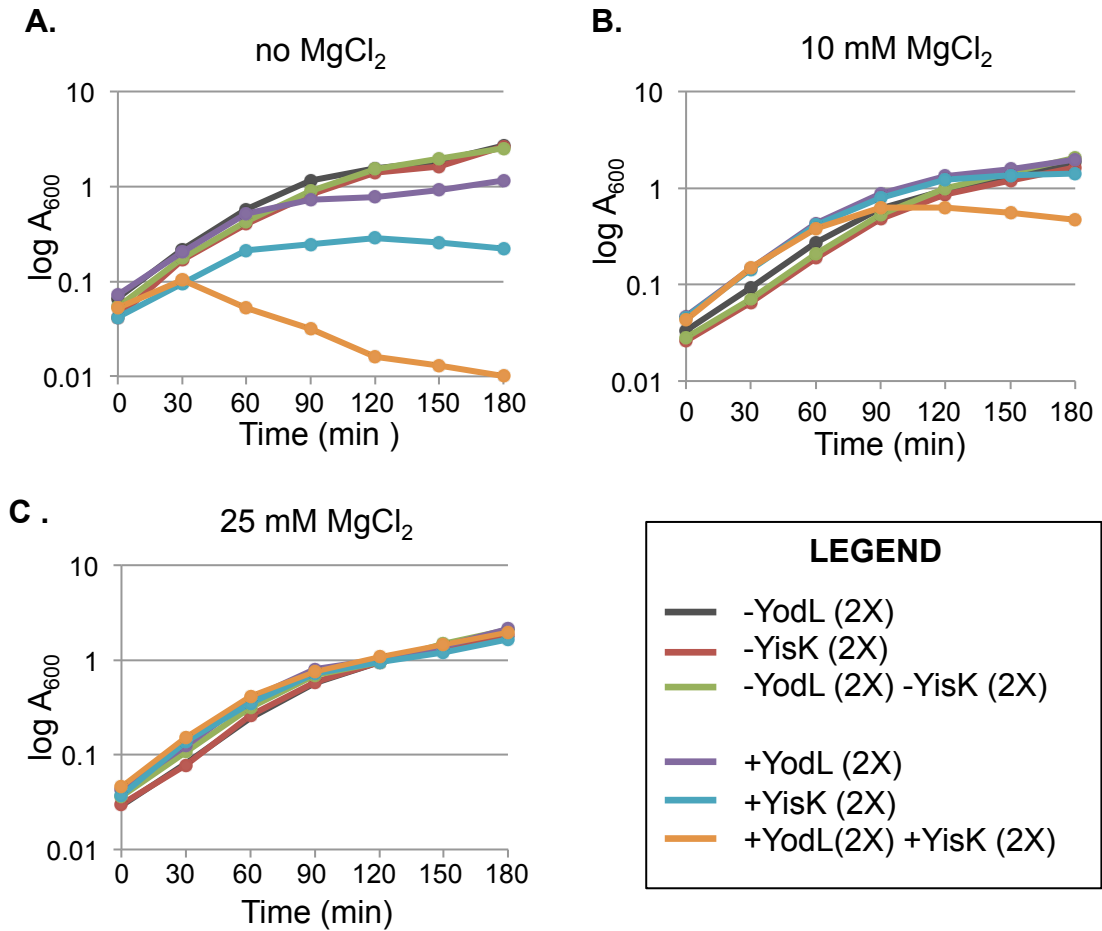

A.

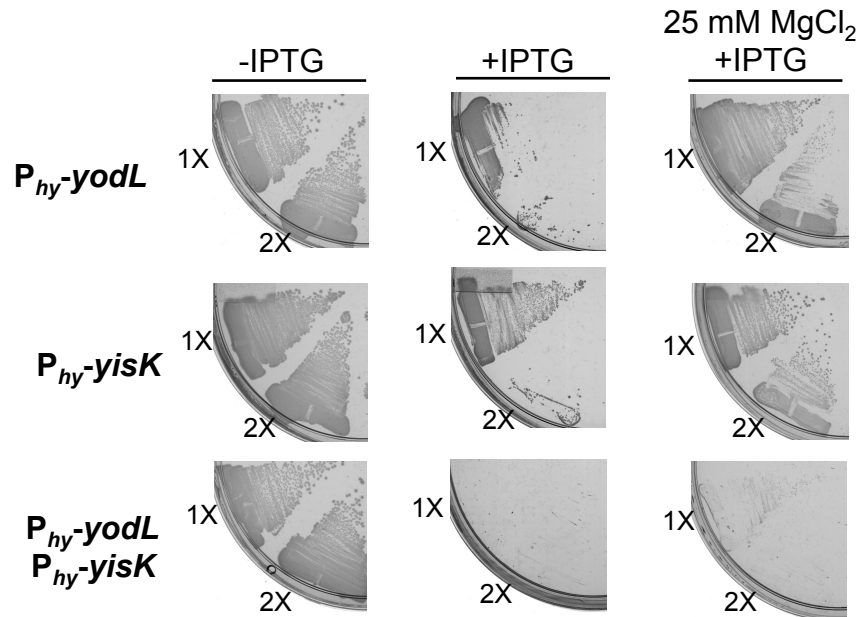

B.

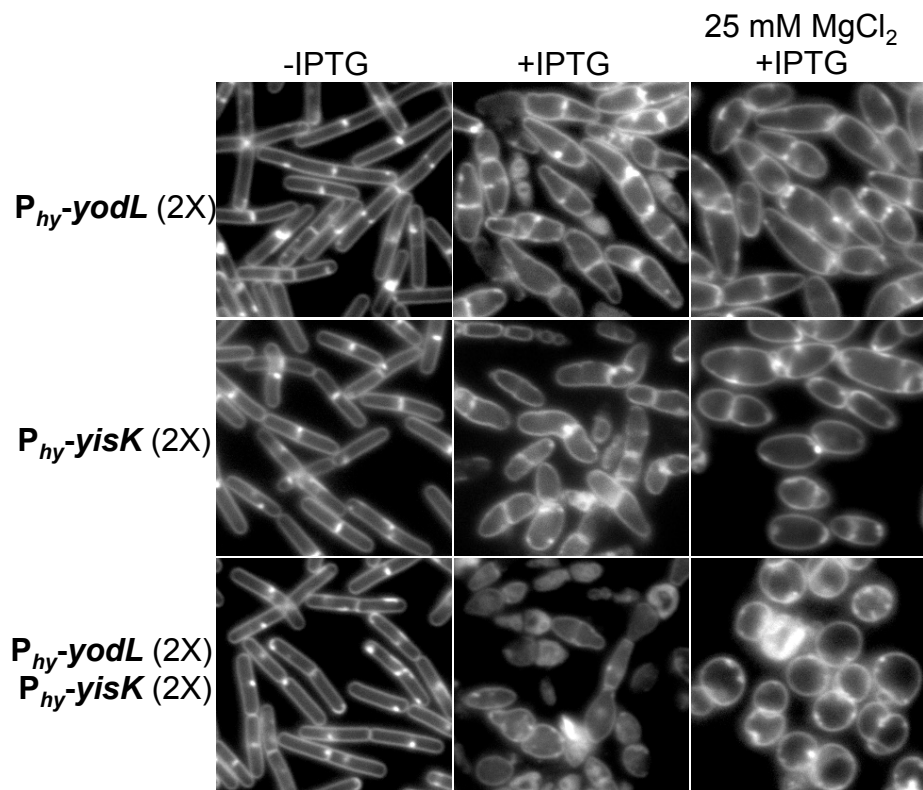

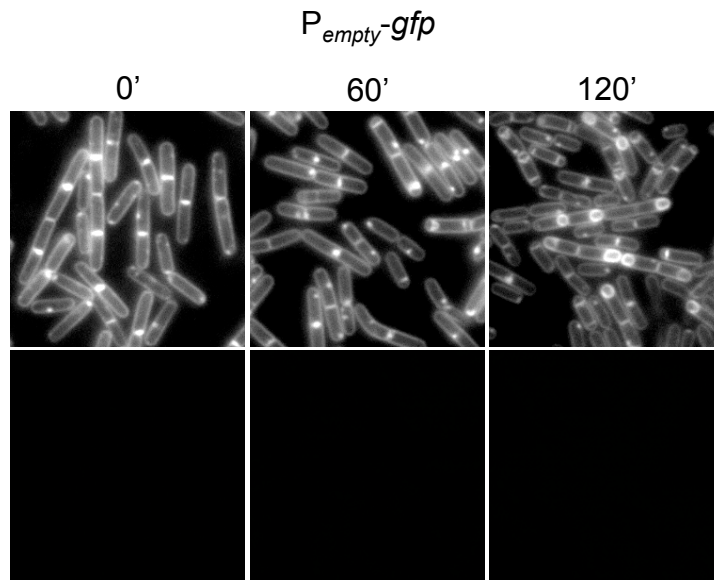

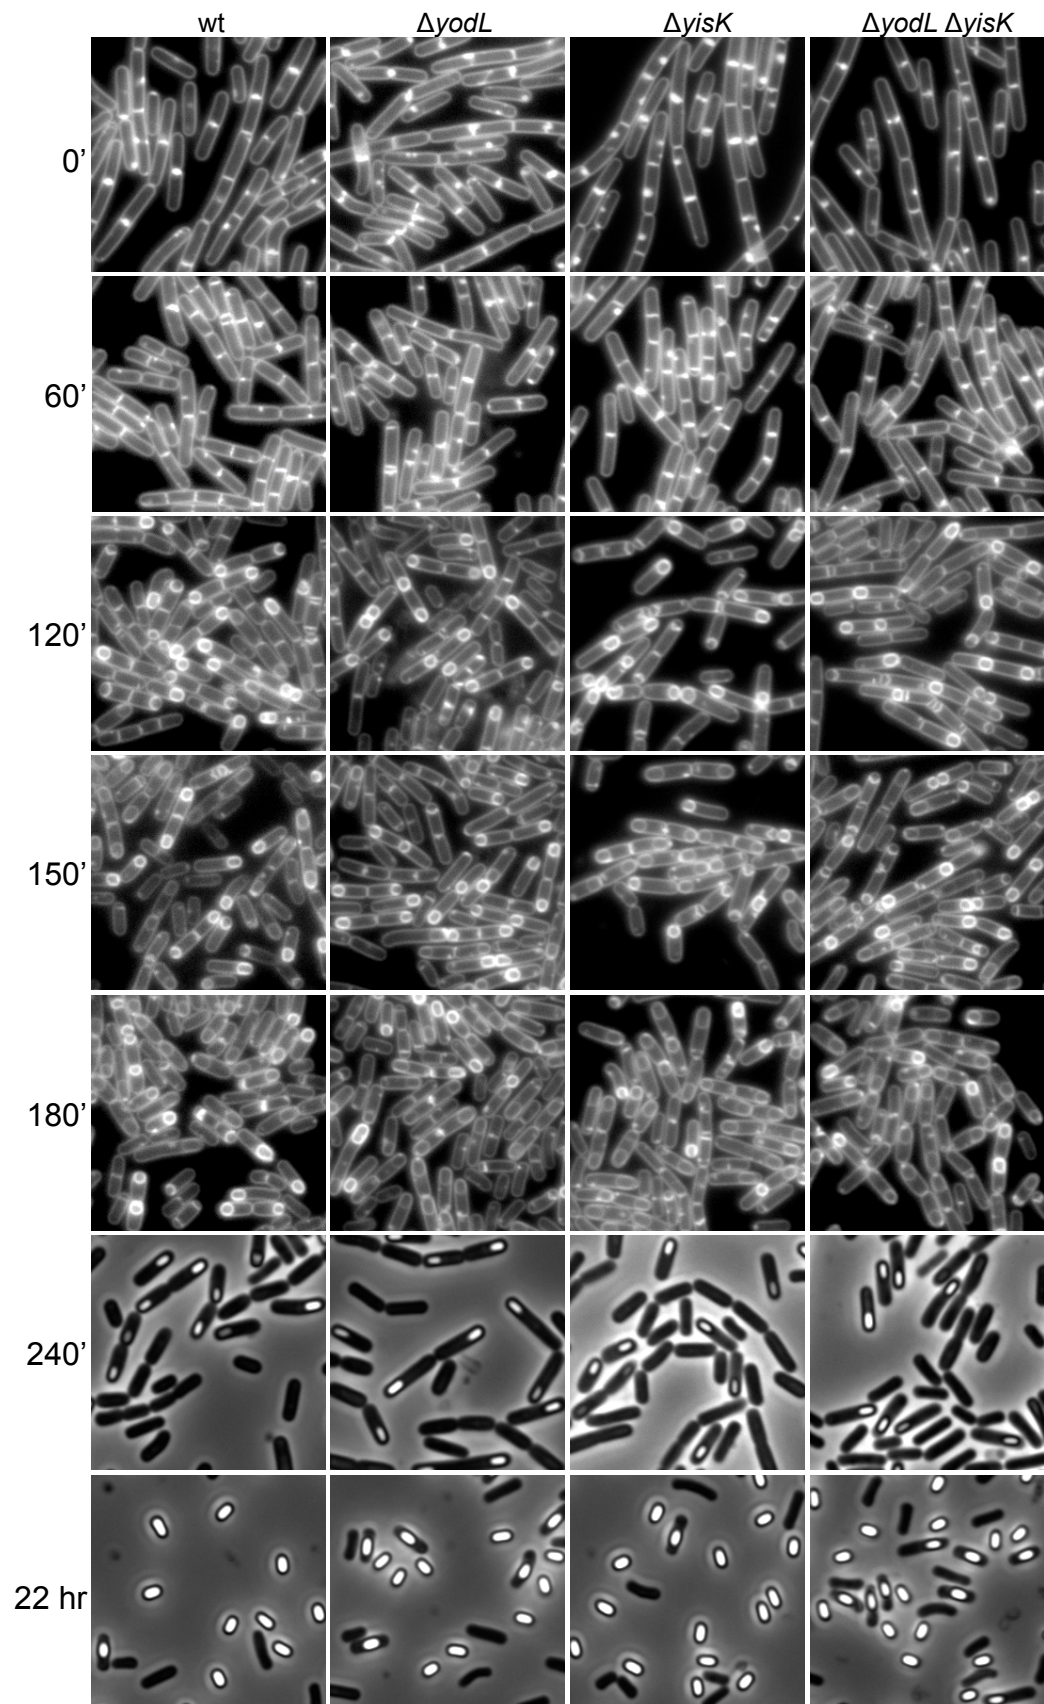



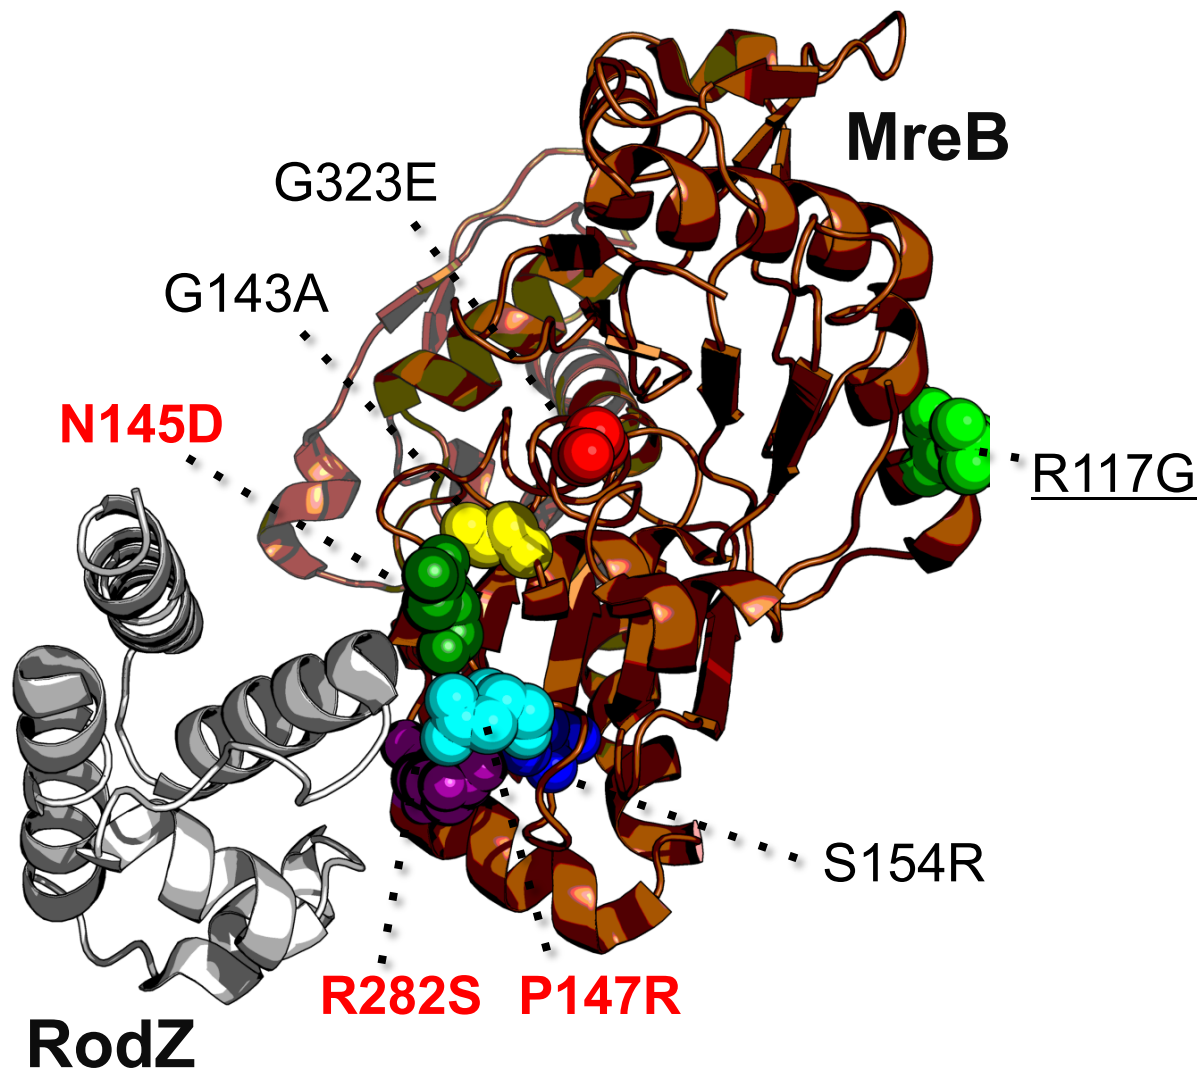

|                         |   |           |                          |                            |                    |
|-------------------------|---|-----------|--------------------------|----------------------------|--------------------|
| <i>T. maritima</i> MreB | 1 | ---       | MLRKDIGIDLGTANTLVFLRGKGI | VNPEPSVIAIDSTTGEILKVGLEAKN | MIGKTPA            |
| <i>B. subtilis</i> MreB | 1 | MFGIGARDL | GIDLGTANTLVFVRGKGI       | VREPSVVALQTDTKSIVAVGND     | AKNMIGRTPG         |
| <i>B. subtilis</i> Mbl  | 1 | ---       | MFARDIGIDLGTANVLT        | TVRGGKIVLNPEPSVVALDKNSG    | KVLAVGEEARRMVGRTPG |

|                         |    |                  |                    |                    |                  |   |
|-------------------------|----|------------------|--------------------|--------------------|------------------|---|
| <i>T. maritima</i> MreB | 58 | TIKAIRPMRDGVIADY | TVALVMLRYFINKAKG-- | GMNLFKPRVVI        | IGVPIGITDVERRAIL | * |
| <i>B. subtilis</i> MreB | 61 | NVVALRPMKDGVIADY | ETATMMKYVINQAI     | KNKGMFARKPYVMVCVPS | GITAVEBRAVI      |   |
| <i>B. subtilis</i> Mbl  | 58 | NIVAIRPLKDGVIAD  | FEVTEAMLKHFINKLN-- | VKGLFSKPRMLICCP    | TNITSVEQAIK      |   |

|                         |     |                   |                 |                     |                  |  |
|-------------------------|-----|-------------------|-----------------|---------------------|------------------|--|
| <i>T. maritima</i> MreB | 116 | DAGLEAGASKVFLIEEP | MAAAIGSNLNV     | EPSGNMVVDIGGGTTEVA  | VISLGSIVTWESI    |  |
| <i>B. subtilis</i> MreB | 121 | DATROAGARDAYPI    | IEEPFAAAIGANLPV | WEPTGSMVVDIGGGTTEVA | ISLGGIVTSOSI     |  |
| <i>B. subtilis</i> Mbl  | 116 | EAAEKSGGKHVYLE    | EEEPKVAAGMEIF   | QPSGNMVVDIGGGT      | TDIAVISMGDIVTSSI |  |

|                         |     |                 |               |              |                      |        |
|-------------------------|-----|-----------------|---------------|--------------|----------------------|--------|
| <i>T. maritima</i> MreB | 176 | RIAGDEMDEAIVQYV | RETYRVAIGERTA | ERVKIEIGNVFP | SKENDELETTVSGIDLSTGL |        |
| <i>B. subtilis</i> MreB | 181 | RVAGDEMDDAI     | INYIRKTYNLMIG | DRTAEAIKMEIG | SAAEAPESDNMEIRGR--   | DLTGL  |
| <i>B. subtilis</i> Mbl  | 176 | KMAGDKFDM       | EILNYIKREYKLL | IGERTAEDIKIK | VATVFPDARHEEISIRGR-- | DMVSGL |

|                         |     |             |              |              |                       |               |
|-------------------------|-----|-------------|--------------|--------------|-----------------------|---------------|
| <i>T. maritima</i> MreB | 236 | PRKLTLLKGG  | EVREALRSVVVA | IVESVRTTLEK  | TPPELVSDIIERGIFLTGGGS | LLRGLDT       |
| <i>B. subtilis</i> MreB | 239 | PKTIEITGKEI | SNALRDVSTIVE | AVKSTLEKTPPE | LAADIMDRGIVLTGGGALL   | RNLDK         |
| <i>B. subtilis</i> Mbl  | 234 | PRTITVNSKE  | VEEALRESVA   | VIVQAARKOV   | LERTPPELSADIIDRGVI    | ITGGGALLNGLDQ |

|                         |     |              |           |     |           |              |                |
|-------------------------|-----|--------------|-----------|-----|-----------|--------------|----------------|
| <i>T. maritima</i> MreB | 296 | LLQKETGISVIR | SEEP      | LTA | VAKGAGM   | VLDKVNILKKLQ | GAG            |
| <i>B. subtilis</i> MreB | 299 | VISEETKMPV   | LIAEDPLDC | V   | AIGTGKALE | HIHLFKG      | KTR--          |
| <i>B. subtilis</i> Mbl  | 294 | LLAEELKVP    | VVLVAENP  | MDC | V         | AIGTGM       | LDNMDKLPKRKLS- |

***B. subtilis* Mbl**Threaded to *T. maritima* MreB (PDB:1JCG)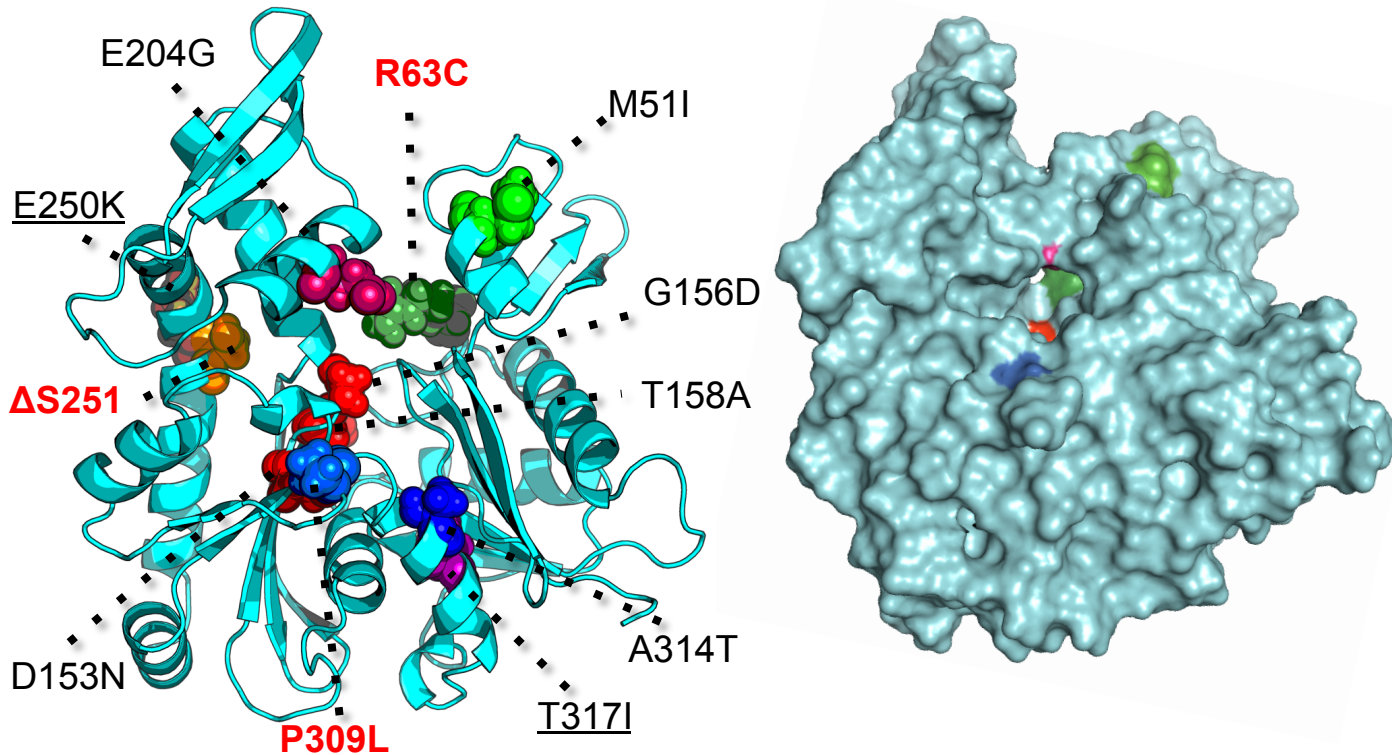

|                           |   |                                                                |
|---------------------------|---|----------------------------------------------------------------|
| <i>T. maritima</i> MreB   | 1 | -----MLRKDIGIDLGTANTLVFLRKGKIVVNEPSVIAIDSTTC---EILKVGLEAK      |
| <i>B. subtilis</i> MreB   | 1 | -----MFGIGARDLGLDLGTANTLVFKGKIVVREPSVVALQTDTE---RSIVAVGNDAK    |
| <i>B. subtilis</i> Mbl    | 1 | -----MFARDIGIDLGTANTLVLRVKGKIVLNEPSVVALDKNSG---KVLAVGEAR       |
| <i>C. crescentus</i> MreB | 1 | 1MPSLLFGVISNDIAIDLGTANTLIYQKKGKIVLNEPSVVALRN--VGGRKVVHAVGIEAK  |
| <i>E. coli</i> MreB       | 1 | 1MLKKFRGMFNSDLSIDLGTANTLIYVKGQGIVLNEPSVVALRQDRAGSPKSVAAVGHDAK  |
| <i>V. cholerae</i> MreB   | 1 | 1MFKKLRGMFNSDLSIDLGTANTLIYVKGQGIVLDEPSVVALRQDRKGRGGKTVAAVGHAAK |

|                           |    |                                                               |
|---------------------------|----|---------------------------------------------------------------|
| <i>T. maritima</i> MreB   | 50 | NMLGKTPATHKAIKRPMDGVIADYTVVALVMLRYEINKAKGG--MNLFKPRVVICVPIGIT |
| <i>B. subtilis</i> MreB   | 50 | NMLGRTPGNVVALRPMKDGVIADYETATMMKYVINQAIKNGMFKRKPVVMVCVPSGIT    |
| <i>B. subtilis</i> Mbl    | 50 | RMVGRTPGNIVAIRPKKDGVIADFEVTEAMLRKHFINKLNVRG--LFSKPRMLICCPNTLT |
| <i>C. crescentus</i> MreB | 59 | QMLGRTPGHMEAIRPMDGVIADFEVLEEMIKKFKIRKVNHRK-GFVN-PEVIVCVPSGAT  |
| <i>E. coli</i> MreB       | 61 | QMLGRTPGNTAAIRPMKDGVIADFEVTEKMLQHFIRKQVHNS-FMRPSPRVLVCVPGAT   |
| <i>V. cholerae</i> MreB   | 61 | QMLGRTPGNTSAIRPMKDGVIADFEVTEKMLQHFIRQVHDNS-VLKPSPRVLCVPCGST   |

|                           |     |                                                              |
|---------------------------|-----|--------------------------------------------------------------|
| <i>T. maritima</i> MreB   | 108 | DVERRATLDAGLEAGASKVFLIEEPMAAAIGSNLNVBEPSGNMVDIGGGTTEVAVISLG  |
| <i>B. subtilis</i> MreB   | 113 | AVEERAVIDATROAGARDAYPIIEPFAAAIGANLPVWEPTGSMVVDIGGGTTEVAVISLG |
| <i>B. subtilis</i> Mbl    | 108 | SVYOKATKEAAEKSGKGVYLEIEPKVAAIGAGMEIFQPSGNMVDIGGGTTEVAVISMG   |
| <i>C. crescentus</i> MreB | 117 | AVERRAINDSCNAGARRVGLIDEPMAAAIGAGLPIHEPTGSMVVDIGGGTTEVAVISIS  |
| <i>E. coli</i> MreB       | 120 | QVERRATRESAOCAGAREVFLIEEPMAAAIGAGLPSSEATGSMVVDIGGGTTEVAVISLN |
| <i>V. cholerae</i> MreB   | 120 | QVERRATRESALCAGAREVFLIDEPMAAAIGAGLRVSEPTGSMVVDIGGGTTEVAVISLN |

|                           |     |                                                                |
|---------------------------|-----|----------------------------------------------------------------|
| <i>T. maritima</i> MreB   | 168 | SIVTWESIRIAGDEMDIATVOYVRETIRVAIGERTAERVKIIEIGNVFPFSKENDELETTVS |
| <i>B. subtilis</i> MreB   | 173 | GIVTSQSIRVAGDEMDDAIINYIRKTYNLMIGDRTAEAIKMEIGSAEAP--EESDNMEIR   |
| <i>B. subtilis</i> Mbl    | 168 | DIVTSSSIKMGADKPDMEIINYIKREYKLLIGERTAEDIKIKVAVVF--DARHEIETIR    |
| <i>C. crescentus</i> MreB | 177 | GIVYRSVRVCGDKMDEAITSYMRHHNLLIGETAERIKKEIGTARAPADGGLSIVDK       |
| <i>E. coli</i> MreB       | 180 | GIVYSSVRIIGDRFDEAIINYVRRNYGSLIGEATAERIKHEIGSAVFP--GDEVREIEVR   |
| <i>V. cholerae</i> MreB   | 180 | GIVYSSVRIIGDRFDEAIINYVRRNYGSLIGEATAERIKHEIGSAVFP--GDDVQIEIVR   |

|                           |     |                                                                |
|---------------------------|-----|----------------------------------------------------------------|
| <i>T. maritima</i> MreB   | 228 | GIDLSTGLPKRLTLKGGVREALRSVVAIVESVVRTLEKTPPELWSDIERGIFLTGGG      |
| <i>B. subtilis</i> MreB   | 231 | GRDLLGLPKRTIETGKETSINALRDTVSTIVEAVKSTLEKTPPELAADIHDRGIVLTGGG   |
| <i>B. subtilis</i> Mbl    | 226 | GRDMVSGLPKRTITVNSKEVEEALRESVAIVQAAKQVLERTPPELSADIHDRGIVLTGGG   |
| <i>C. crescentus</i> MreB | 237 | GRDLMOGVPREVRISEKQADALAEFPVGVIVEAVKVALEAPPPELASDIADKGIPLTGGG   |
| <i>E. coli</i> MreB       | 238 | GRNLAEQVPRGFTLNSNEILEALQEPITGIVSAVMVALEOCPPPELASDISERGMVLTGGG  |
| <i>V. cholerae</i> MreB   | 238 | GRNLAEQVPRSFLLNSNEILEALQEPITGIVSAVMVALEOCPPPELASDISENGMVLTTGGG |

|                           |     |                                                      |
|---------------------------|-----|------------------------------------------------------|
| <i>T. maritima</i> MreB   | 288 | SLIRGLDTLLQKETGHSVIRSEEPITAVAKGACMVLDKVNIIKLLQOGAG-- |
| <i>B. subtilis</i> MreB   | 291 | ALLRNLDKVISEETKMPVLAEDDPLDCVAIGCKALDEHHLFKKTR---     |
| <i>B. subtilis</i> Mbl    | 286 | ALLNGLDOLLAEEELKVPVVAENPMDCAVIGCVMLNDMDKLPKRLKS---   |
| <i>C. crescentus</i> MreB | 297 | ALLRGLDAEIRDHTGLPVTVADPPLSCVALGCGKVLHHPKMKGGVFESETIA |
| <i>E. coli</i> MreB       | 298 | ALLRNLDRLLMEETGIPVVVAEDPLTCVARGGKALEMIDMHGGDFSEEL    |
| <i>V. cholerae</i> MreB   | 298 | ALLKDLDRLLMEETGIPVVVAEDPLTCVARGGKALEMIDMHGGDFSEEL    |
